Immunology of asymptomatic parasitemia

1 **Asymptomatic carriage of *Plasmodium falciparum* in children living in a hyperendemic area occurs**  
2 **independently of IgG responses but is associated with a balanced inflammatory cytokine ratio.**

3 Balotin Fogang<sup>1,2</sup>, Matthieu Schoenhals<sup>1</sup>, Franklin M. Maloba<sup>1</sup>, Marie Florence Biabi<sup>1,3</sup>, Estelle  
4 Essangui<sup>1</sup>, Christiane Donkeu<sup>1,2</sup>, Glwadys Cheteug<sup>1,4</sup>, Marie Kapen<sup>1</sup>, Rodrigue Keumoe<sup>1</sup>, Sylvie  
5 Kemleu<sup>1</sup>, Sandrine Nsango<sup>1,5</sup>, Douglas H. Cornwall<sup>6</sup>, Carole Eboumbou<sup>1,5</sup>, Ronald Perraut<sup>1</sup>, Rosette  
6 Megnekou<sup>2</sup>, Tracey J. Lamb\*<sup>6</sup> and Lawrence S. Ayong\*<sup>1</sup>

7 **Affiliations:**

8 <sup>1</sup> Molecular Parasitology Laboratory, Centre Pasteur du Cameroun, BP 1274 Yaounde, Cameroon

9 <sup>2</sup> Department of Animal Biology and Physiology of the University of Yaoundé I, BP 812 Yaounde,  
10 Cameroon

11 <sup>3</sup> Department of Biochemistry, University of Douala, BP 24157 Douala, Cameroon

12 <sup>4</sup> Department of Medical Laboratory Sciences, University of Buea, BP 63 Buea, Cameroon

13 <sup>5</sup> Faculty of Medicine and Pharmaceutical Sciences, University of Douala, BP 2701 Douala,  
14 Cameroon

15 <sup>6</sup> Department of Pathology, University of Utah, 15 N Medical Drive, Salt Lake City 84112, USA

16 \* Co-corresponding authors

17 Correspondence to: Tracey Lamb [tracey.lamb@path.utah.edu](mailto:tracey.lamb@path.utah.edu) Tel: +1 801 213 2097

18

Immunology of asymptomatic parasitemia

19 **Footnote Page**

20 All authors declare no conflict of interest in this study. This work was supported by a capacity  
21 building grant from the Institute Pasteur International Division to LSA. This information has  
22 previously been presented at the American Association for Tropical Medicine and Hygiene Annual  
23 Meeting in 2019. Correspondence to: Tracey Lamb [tracey.lamb@path.utah.edu](mailto:tracey.lamb@path.utah.edu)

## Immunology of asymptomatic parasitemia

### 24 **Abstract**

25 **Background:** Asymptomatic carriage of infected red blood cells (iRBCs) can be prevalent in  
26 communities regardless of transmission patterns and can occur with infection of different  
27 *Plasmodium* species. Clinical immunity dampens the inflammatory responses leading to disease  
28 symptoms in malaria. The aim of this study was to define the immunological correlates of  
29 asymptomatic carriage of *P. falciparum* in a highly exposed population.

30 **Methods:** 142 asymptomatic *Plasmodium*-infected individuals greater than 2 years of age without  
31 fever (body temperature  $<37.5^{\circ}\text{C}$ ) were followed weekly for 10 weeks before being treated with  
32 artemisinin-based combination treatment (ACT). Plasma levels of 38 cytokines were measured at  
33 baseline by Luminex and the quantity and growth inhibitory activities of circulating parasite-reactive  
34 antibodies measured. The *Plasmodium* antigen tested included *P. falciparum* merozoite extract (ME)  
35 and schizont extract (SE), and the recombinant proteins Erythrocyte binding antigen 175 (EBA-175)  
36 and merozoite surface protein 1 (MSP-1<sub>19</sub>).

37 **Results:** Median levels of IgG against *P. falciparum* EBA-175 and MSP-1<sub>19</sub> at baseline were  
38 significantly higher in those older than 20 years of age compared with the younger age group and  
39 appeared to correlate with better parasite control. Amongst all participants there were no discernible  
40 changes in IgG levels over time. Parasite density was higher in the younger age group and associated  
41 with IL-10, TNF- $\alpha$  and MCP-1 levels. A balanced IL-10:TNF- $\alpha$  ratio was associated with  
42 asymptomatic malaria regardless of age, and balanced ratios of IL-10/TNF- $\alpha$  and IL-10/IFN- $\gamma$  were  
43 the only significant correlate of maintenance of asymptomatic malaria over the course of the study in  
44 individuals 20 years of age and younger.

45 **Conclusion:** The above findings indicate that asymptomatic carriage of *P. falciparum* in children  
46 living in a hyperendemic area occurs independently of IgG but is associated with a balanced  
47 inflammatory cytokine ratio.

Immunology of asymptomatic parasitemia

48 **Key words:** Asymptomatic malaria, *Plasmodium falciparum*, IgG and cytokine levels, TNF- $\alpha$ , IL-  
49 10

## 50 **Introduction**

51 Malaria is still a significant global health problem with an estimated 249 million cases and 608 000  
52 deaths in 2022 [1]. Although mortality rates from malaria have decreased considerably since the turn  
53 of the century [2] this has been paralleled by high increases in proportions of asymptomatic infections,  
54 known to contribute significantly to persistent malaria transmission in most endemic countries [3,4].  
55 Asymptomatic infections can persist for weeks to years [5] and untreated *P. falciparum* infections  
56 have been shown persist on average for 6 months, with fluctuations in parasite density over the course  
57 of an infection [6,7]. The maintenance of chronic asymptomatic malaria will depend on the host  
58 immune response to the blood stage of *Plasmodium* [3]. Anti-parasite immunity directly suppress  
59 parasite growth resulting in low infection densities (below the pyrogenic threshold [3,8]) whilst anti-  
60 disease immunity modulates inflammation-mediated clinical manifestations of the infection.

61 Older children and adults have more cumulative exposure to parasite variants circulating within the  
62 community, developing adaptive responses which mediate both anti-parasite and anti-disease  
63 immunity [9,10]. However, asymptomatic infections have been documented in younger children < 5  
64 years who are too young to have developed robust adaptive immunity [11]. This suggests that  
65 asymptomatic malaria may be differentially controlled by innate and adaptive immune responses  
66 depending on age.

67 Anti-parasite immunity which is acquired with age or exposure [12,13], is mediated mainly by  
68 antibodies which control parasite replication and mediate clearance of *Plasmodium*-infected red  
69 blood cells (iRBCs) [14–16]. Suppression of inflammation associated with iRBCs depends on the  
70 balance between anti- and pro-inflammatory cytokine responses [17,18] and it has been hypothesized  
71 that asymptomatic infections are associated with a shift in host immune responses towards an anti-  
72 inflammatory profile after multiple exposures to malaria [19]. This could occur via a decrease in

## Immunology of asymptomatic parasitemia

73 levels of pro-inflammatory immune mediators such as IFN- $\gamma$ , TNF- $\alpha$ , or an increase in anti-  
74 inflammatory mediators such as IL-10 or TGF- $\beta$  [18,20–22].

75 The relative contributions of anti-parasite and anti-disease immunity to the maintenance of persistent  
76 asymptomatic *Plasmodium* infections in younger individuals and older individuals remain unclear.  
77 To determine the immunological associations of chronic asymptomatic malaria in younger ( $\leq 20$   
78 years) and older ( $> 20$  years) individuals we have undertaken a longitudinal study of highly exposed  
79 individuals of all ages with asymptomatic malaria over a 3-month period where we monitored the  
80 stability of IgG and cytokine responses. We also examined these responses upon clearance of  
81 parasites to ascertain which responses depended on the presence of circulating parasites. Our study  
82 demonstrates a lack of correlation of iRBC density and IgG responses in individuals  $\leq 20$  years old,  
83 with an association of parasite carriage with IL-10 and an association of asymptomatic status with a  
84 balanced ratio of IL-10:TNF- $\alpha$  and IL-10: IFN- $\gamma$ .

85

## 86 **Material and methods**

### 87 **Ethics statement**

88 The study protocol was approved by the Cameroon National Ethics Committee for Human Health  
89 Research (Ethical clearance N $^{\circ}$ : 2018/09/1104/CE/CNERSH/SP) and the Ministry of Public Health.  
90 Written informed consent was obtained from each participant or parent/guardian of minor participants  
91 ( $< 19$  years old) prior to enrolment into the study. Assent was obtained from all children older than  
92 12 years of age.

### 93 **Study area and population**

94 The study population consisted of individuals of both genders aged at least two years of age and  
95 permanently living in one of the five selected villages of the Esse health district, Mefou-et-Afamba  
96 Division, Centre Region of Cameroon where malaria transmission is perennial, stable and hyper-  
97 endemic with *P. falciparum* as the predominant *Plasmodium* species. The study area has been

## Immunology of asymptomatic parasitemia

98 described elsewhere [23–25]. The inclusion criteria were: i) obtain the consent of each older  
99 participant or parent or legal guardian for the children, ii) living permanently in the study area, iii)  
100 not pregnant.

### 101 **Study design and participants**

102 This was a longitudinal household-based study that involved 353 individuals. Participants were  
103 considered asymptomatic for malaria if positive for *P. falciparum* using multiplex nested PCR in the  
104 absence of fever at least forty-eight hours prior to enrolment. Being febrile was assessed based on  
105 axillary temperature  $\geq 37.5$  °C or based on the history of fever as independently confirmed by another  
106 household member. All symptomatic individuals (fever + rapid diagnostic test (RDT) +) were treated  
107 with ACT-based drugs following recommended national guidelines. Participants with asymptomatic  
108 carriage of *Plasmodium* parasites were monitored weekly until they either developed a fever, or until  
109 the end of the follow up period at week 16 post-enrolment. Participant follow-up comprised of weekly  
110 interviews regarding the occurrence of fever during the past week, measurement of axillary  
111 temperatures on each visit, and laboratory testing for malaria at weeks 1, 4, 11 and 16 (PCR and  
112 microscopy). All symptomatic cases occurring during the follow-up period were treated with ACT as  
113 recommended and excluded from further follow-up. At week 11 post-enrolment all participants with  
114 persisting asymptomatic parasitemia were treated as recommended, and monitored for five additional  
115 weeks to assess the effect of ACT-based antimalarial treatment on selected host immune responses.  
116 Participants with persistent asymptomatic parasitemia 10 weeks following enrolment were  
117 considered as persistent asymptomatic malaria whereas those who developed malaria-associated  
118 symptoms before week 11 post-enrolment were considered as developing uncomplicated malaria.

### 119 **Blood sample collection, malaria diagnosis and parasite genotyping**

120 Approximately 3 ml of venous blood was collected in EDTA-coated tubes and used for laboratory  
121 testing for malaria and blood hemoglobin levels as well as to obtain plasma for immunological  
122 analysis. Plasma was separated from the red blood cell (RBC) pellet by centrifugation (3500 RPM,

## Immunology of asymptomatic parasitemia

123 5 min) and stored at -80 °C until use. Blood hemoglobin levels were assessed using a portable Mission  
124 Hb haemoglobinometer (ACON Laboratories, USA).

125 Parasite density (parasites/ $\mu$ l) was determined by microscopic examination of Giemsa-stained thick  
126 blood smears. Parasite density was determined based on the number of parasites per at least 200 WBC  
127 count on a thick film, assuming a total white blood cell count of 8000 cells/ $\mu$ L of whole blood. A  
128 blood slide was considered positive when a concordant result was obtained by at least two  
129 independent microscopists and when a discrepancy occurred, a third microscopist was used for  
130 confirmation. A slide was considered negative if no parasites were detected after a count of 500 white  
131 blood cells.

132 Genomic DNA was extracted from dried blood spots using the Chelex method [26], and used to  
133 screen for *Plasmodium* infections by multiplex nested PCR targeting the 18S small subunit rRNA  
134 (ssrRNA) genes as previously described [24]. Genotyping of *msp2* gene was performed by nested  
135 PCR on *P. falciparum* PCR positive samples as previously described [24,27].

## 136 **Case definitions for the study**

137 Participants were defined as asymptomatic if positive for malaria parasites by PCR in the absence of  
138 fever at least 48 hours prior to enrolment. Febrile malaria was determined based on RDT, light  
139 microscopy or PCR positivity for malaria parasites and axillary temperature  $\geq 37.5^{\circ}\text{C}$  or a history of  
140 fever in the past 48 hours. Those developing uncomplicated malaria were defined as asymptomatic  
141 individuals who had developed fever associated with *Plasmodium* infection during the 10-week  
142 infection follow-up period, whereas the persistent asymptomatic malaria classification represented  
143 the asymptomatic individuals who remained asymptomatic until anti-malarial treatment at the end of  
144 the infection follow-up period.

Immunology of asymptomatic parasitemia

## 145 **Anti-*Plasmodium* antibody levels and avidity assessment**

146 Plasma IgG antibody levels and avidity were determined by indirect ELISA method using *P.*  
147 *falciparum* Merozoite extract (ME), schizont extract (SE) or the recombinant proteins erythrocyte  
148 binding antigen-175 (EBA-175) and Merozoite Surface Protein-1<sub>19</sub> (MSP1<sub>19</sub>) as coating antigens.  
149 ME and SE were isolated from laboratory maintained *P. falciparum* 3D7 parasites as described  
150 previously [28], and used for protein extraction by freeze-thaw fractionation [23,29]. The  
151 recombinant protein EBA-175 (F3 region) was obtained from BEI Resources (MRA-1162), whereas  
152 *P. falciparum* MSP1<sub>19</sub> was produced using a baculovirus-insect cell expression system [30].

153  
154 96-well microplates (F96 CERT-Maxisorp) were coated with each antigen (2 mg/ml of ME and SE,  
155 0.20 mg/ml of EBA-175 and 0.5 mg/ml of MSP-1<sub>19</sub>) in 0.1 M bicarbonate buffer (for ME, SE and  
156 EBA-175) or PBS (for MSP-1<sub>19</sub>) and incubated overnight at 4°C. Plasma samples were diluted  
157 (1/250) in PBS-T/1%BSA and used to measure anti-*Plasmodium* IgG as previously described [23,31].  
158 Plasma from non-exposed European blood donors (10 samples) were used as naive controls and a  
159 pool of IgG fractions from adults living in high malaria endemic areas was used as positive controls.  
160 Results were expressed as optical-density ratios (OD sample/mean OD naive control). For avidity  
161 testing, 100 µL of 8M urea in wash buffer (treated wells) or 100 µL of wash buffer (untreated wells)  
162 were added for 15 minutes at room temperature to the respective wells following primary antibody  
163 binding as previously described [32]. Avidity indices (AI) were calculated as proportion of bound  
164 antibodies following urea treatment (AI = [mean OD of treated wells /mean OD of untreated wells]  
165 × 100). Samples with OD ratios > 2, corresponding to mean OD naive control + 3SD were considered  
166 as seropositive. In addition, only seropositive samples were used for avidity testing.

167

## 168 **Growth inhibition assay (GIA)**

169 GIA was performed using plasma from endemic and non-endemic individuals as described by  
170 Duncan *et al.* [33]. Briefly, plasma samples were heat inactivated at 56 ° C for 20 min and a 1:20



## Immunology of asymptomatic parasitemia

171 ratio of 50% RBC was added to each sample and incubated at room temperature for 1 h to remove  
172 the RBC-reactive antibody. After spinning for 2 min at 13,000 x g to pellet the RBCs, the  
173 supernatant was transferred to a 96-well V-bottom plate. Synchronized late trophozoite/early  
174 schizont (30-40 h) stages of 3D7 *P. falciparum* at 0.5% parasitemia were incubated with plasma  
175 (1:10 ratio) for 48 h at 37 °C. The GIA harvest (parasite growth) was carried out by SYBR green-I  
176 DNA quantification assay [34]. Parasite growth inhibition (GI) activities of plasma antibodies were  
177 presented as: GI indices (%) = 100 x [1 - ((OD sample - OD RBC) / (OD parasitized RBC - OD  
178 RBC))].

## 179 **Determination of plasma cytokine levels**

180 Plasma concentrations of 38 immune mediators including interleukin (IL)-1 $\alpha$ , IL-1 $\beta$ , IL-1RA, IL-2  
181 IL-3, IL-4, IL-5, IL-6, IL-7, IL-8, IL-9, IL-10, IL-12p40, IL-p70, IL-13, IL-15, IL-17A, interferon  
182 (IFN)- $\alpha$ 2, IFN- $\gamma$ , tumor necrosis factor (TNF)- $\alpha$ , lymphotoxin- $\alpha$  (LT- $\alpha$ ), IFN- $\gamma$  induced protein (IP-  
183 10), monocyte chemoattractant protein (MCP)-1, MCP-3, macrophage inflammatory protein (MIP)-  
184 1 $\alpha$ , MIP-1 $\beta$ , Eotaxin, Fractalkine, human growth-regulated oncogene (GRO), Macrophage-derived  
185 chemokine (MDC), granulocyte-macrophage colony-stimulating factor (GM-CSF), granulocyte  
186 colony-stimulating factor (G-CSF), sCD40L, FMS-like tyrosine kinase 3 ligand (Flt-3L), epidermal  
187 growth factor (EGF), fibroblast growth factor 2 (FGF-2), transforming growth factor alpha (TGF- $\alpha$ )  
188 and vascular endothelial growth factor (VEGF) were determined by Luminex-based method using  
189 the Human Cytokine/Chemokine Magnetic Bead Panel MILLIPLEX MAP Kit (Cat. No.  
190 HCYTMAG-60K-PX38, EMD Millipore Corporation) according to the manufacturer's instructions.  
191 Briefly, 25  $\mu$ L of premixed magnetic capture beads were incubated with equal volumes of plasma or  
192 diluted standard in a 96-well microplate placed on a horizontal plate shaker for 2 hours. After washing  
193 using a magnetic plate, plates were incubated with 25  $\mu$ L/well of biotinylated detection antibodies  
194 for 1 hour at room temperature followed by 25  $\mu$ L of streptavidin-PE in each well for 30 minutes at  
195 room temperature. Median fluorescence intensity was read on a Luminex MAGPIX Analyser (XMAP  
196 Technology) equipped with xPONENT software version 4.2. The relative concentration of each

## Immunology of asymptomatic parasitemia

197 cytokine (pg/ml) in each sample was determined based on the automatically generated standard curve  
198 for each analyte. Analyte amounts less than the limit of detection for each cytokine were attributed  
199 the value of detection limit.

### 200 **Statistical analysis**

201 Statistical analyses were performed using RStudio version 4.1.1 or version 4.2.2 [35] and Graphpad  
202 Prism version 8.4.3 (Graphpad software, San Diego, California USA). Differences in antibody and  
203 cytokine distribution between two or more groups were determined using Wilcoxon signed rank test  
204 and Kruskal-Wallis test, respectively. Spearman rank correlation tests or linear regression were  
205 used to determine the correlation between quantitative variables. Differences in categorical  
206 variables were determined by chi-square tests. P-values < 0.05 were considered statistically  
207 significant. Factor analysis of mixed data (FAMD) with FactoMineR and factoextra packages was  
208 used to assess the association between cytokines levels and age and circulating parasite loads. The  
209 complexHeatmap and ggpubr packages were used to draw the heatmaps and the line plots,  
210 respectively. Given that the aim of this study was to determine the host immunological  
211 determinants in the maintenance of the asymptomatic infections, among the 353 individuals  
212 included, only participants with complete information on the study outcome during the longitudinal  
213 follow-up period were included in the analysis (n= 211). Participants who missed at least one of the  
214 follow-up points (the predominant reason being farming far away from the enrolment site) were not  
215 included in our study. Three samples (2 symptomatic and 1 asymptomatic) were excluded because  
216 no cytokines were detected in the plasma. For analysis of cytokines at the initial time point of our  
217 study with respect to correlation with persistent asymptomatic malaria, we employed a mixed linear  
218 model using the LME4 package [36]. Cytokine level was used as the response with conversion  
219 status as the fixed-effect of the model. We used sex and age as random effects in the model and ran  
220 the model separately for children  $\leq 20$  years old, adults  $> 20$  years old and all participants, regardless  
221 of age. To obtain p-value estimates from the t-values we used the lmerTest package [37]. P values  
222 were corrected for multiple comparisons using the Satterthwaite correction. For analysis, parasite

## Immunology of asymptomatic parasitemia

223 densities were separated into three groups as follows, 1. submicroscopic parasitemia, 2. low levels  
224 of microscopic parasitemia (parasitemia between 37.2 parasites/ $\mu$ l and 413.1 parasites/ $\mu$ l) and 3.  
225 high levels of parasitemia (parasitemia > 413.1 parasites/ $\mu$ l, representing the median parasitemia in  
226 the study population).

227

## 228 **Results**

### 229 **Asymptomatic malaria prevalence in the study area**

230 We carried out immunological analysis of a subset of 211 individuals from a previously reported  
231 study of 353 individuals screened for malaria using PCR, where 328 (92.9%) were positive for  
232 *Plasmodium falciparum* infection, of which 266 (81.1%) were asymptomatic and 62 (18.9%) were  
233 symptomatic [24]. This subset had complete sampling from the follow-up study, and included 142  
234 individuals with asymptomatic infection, 61 symptomatic individuals and 8 non-infected individuals.  
235 At baseline when these individuals were first sampled, parasite densities were highly variable  
236 between the symptomatic and asymptomatic groups, and no significant difference was observed in  
237 the median parasite densities of the two groups at the initial time point of the study (**Table 1**). Age,  
238 sex, and hemoglobin levels were also not different across the study groups at this initial time point  
239 (**Table 1**).

240

Immunology of asymptomatic parasitemia

241  
242  
243  
244

| Variables                                        | Non detectable infection (n=8) |                 | Asymptomatic (n=142) |                    | Symptomatic (n=61)    |                    | P value |        |
|--------------------------------------------------|--------------------------------|-----------------|----------------------|--------------------|-----------------------|--------------------|---------|--------|
|                                                  | ≤ 20                           | > 20            | ≤ 20                 | > 20               | ≤ 20                  | > 20               | ≤ 20    | > 20   |
| Age groups                                       | 5                              | 3               | 94                   | 48                 | 42                    | 19                 |         |        |
| n                                                | 5                              | 3               | 94                   | 48                 | 42                    | 19                 |         |        |
| Sex ratio (M:F)                                  | 0.67 (2:3)                     | 50 (1:2)        | 0.82 (42:51)         | 41.2 (14:34)       | 1.1 (22:20)           | 58.3 (7:12)        | 0.7114  | 0.8280 |
| Median age, years (range)                        | 14 (4-20)                      | 68 (50-68)      | 9 (2-19)             | 50 (22-86)         | 9 (2-20)              | 28 (21-64)         | 0.2193  | 0.0028 |
| Median Hb, g/dl (range)                          | 11.8 (10.7-12.7)               | 112.5 (11.9-14) | 12 (4.9-14.3)        | 13.1(10.9-16)      | 11.1 (6.8-14)         | 12.8 (9.4-16.8)    | 0.1866  | 0.9833 |
| % of submicroscopic % (n)                        | -                              | -               | 22.3 (21)            | 60.4 (29)          | 9.5 (4)               | 57.9 (11)          | 0.0746  | 0.8495 |
| Geometric mean parasitemia, parasites/μl (range) | -                              | -               | 575.7 (37.4-68190.5) | 113.5 (38.3-660.2) | 764.1 (38.1-240457.1) | 183.3(37.2-5058.8) | 0.5139  | 0.6101 |

**Table 1. Characteristics of the study population**

The data presented in this table is from 211 individuals from our study at baseline. The subset of 142 asymptomatic individuals included in this table were those individuals with complete data from the follow-up study to 11 weeks and does not include baseline data from individuals who dropped out of the study. P-value was determined using Wilcoxon signed-rank test and Kruskal-Wallis test when comparing two or three groups, respectively. The median parasitemia presented in this table is only for the infected individuals with parasite densities at the detection limit of light microscopy. The sex ratio between groups were compared using chi-square test. Hb: hemoglobin. M: male. F: female.

## Immunology of asymptomatic parasitemia

245

### 246 **Anti-parasite antibodies were inversely correlated with parasitemia but were not associated** 247 **with asymptomatic parasite carriage**

248 Consistent with the hypothesis that host immunity increases with repeated exposure to malaria  
249 parasites, baseline parasite densities above the detection limit of microscopy decreased significantly  
250 with age ( $r = -0.49$ ,  $P < 0.0001$ ) (**Figure 1A**) but only in individuals aged 20 years and younger ( $r = -$   
251  $0.39$ ,  $P < 0.0001$ ) (**Figure 1B**). Of the 142 participants who completed the follow-up study as  
252 designed, 78 (54.9%) remained asymptomatic during the 10-weeks follow-up period, whereas 63  
253 (44.4%) developed malaria-associated fevers and 1 (0.7%) resolved the infection in the absence of  
254 any known antimalarial treatment. Based on the parasitemia distribution of those with microscopic  
255 *Plasmodium* infections at baseline the study population was divided into two groups aged  $\leq 20$  years  
256 and  $> 20$  years old for further analyses. The proportion of submicroscopic infections was significantly  
257 higher ( $P < 0.0001$ ) in the older age group (age  $> 20$  years) at the baseline time point than in the younger  
258 age group (**Figure 1C**). At the baseline time point, median IgG levels against *P. falciparum* merozoite  
259 (ME) and schizont (SE) crude extracts were significantly higher in the  $> 20$ -year age group than in  
260 the younger age group ( $P < 0.0001$ ) (**Figure 2A**). This was mirrored by IgG reactive to *P. falciparum*  
261 recombinant proteins EBA-175 ( $P = 0.0250$ ) and MSP-1<sub>19</sub> ( $P < 0.0001$ ) (**Figure 2A**). Additionally, in  
262 the younger age group IgG levels against merozoite ( $r = 0.22$ ,  $P = 0.0077$ ) and schizont ( $r = 0.29$ ,  $P =$   
263  $0.0004$ ) crude extracts as well as against MSP-1<sub>19</sub> ( $r = 0.15$ ,  $P = 0.0764$ ) but not EBA-175 ( $r = 0.01$ ,  $P =$   
264  $0.8525$ ) were positively correlated with age at the baseline time point (**Figure 2B**). A negative  
265 correlation was observed between IgG levels to *P. falciparum* merozoite and schizont extracts at  
266 baseline and parasite density measured at the same time point (**Supplementary Figure 1**). Indeed,  
267 the multilevel linear regression model adjusted for village and household levels, using IgG levels at  
268 the baseline and age as predictors, showed that only age was the independent predictor of *Plasmodium*  
269 parasite densities in the study population (coef =  $-0.02$ ,  $P = 0.0004$  for age; coef =  $0.01$ ,  $P = 0.9170$  for

#### Immunology of asymptomatic parasitemia

270 ME; coef= -0.19, P = 0.1529 for SE; coef= -0.02, P= 0.4746 for EBA-175; coef= 0.02, P= 0.5362 for  
271 MSP-1<sub>19</sub>).

272 Median IgG levels were not significantly different between participants with sub-microscopic  
273 parasitemia and those with microscopic parasites at baseline (**Supplementary Figure 2A**), and no  
274 significant difference was observed in the *in vitro* growth inhibition potential of inactivated plasma  
275 from submicroscopic parasite carriers and that of microscopic carriers (**Supplementary Figure 2B**).  
276 Both IgG antibody avidity (**Supplementary Figure 3A&B**) and growth inhibition potentials  
277 (**Supplementary Figure 2B**) were similar in the two groups (P> 0.05). Together, these findings  
278 suggest that anti-parasite antibodies may control parasite density levels by mechanisms other than  
279 direct inhibition of parasite growth *in vivo*.

280

## Immunology of asymptomatic parasitemia

281

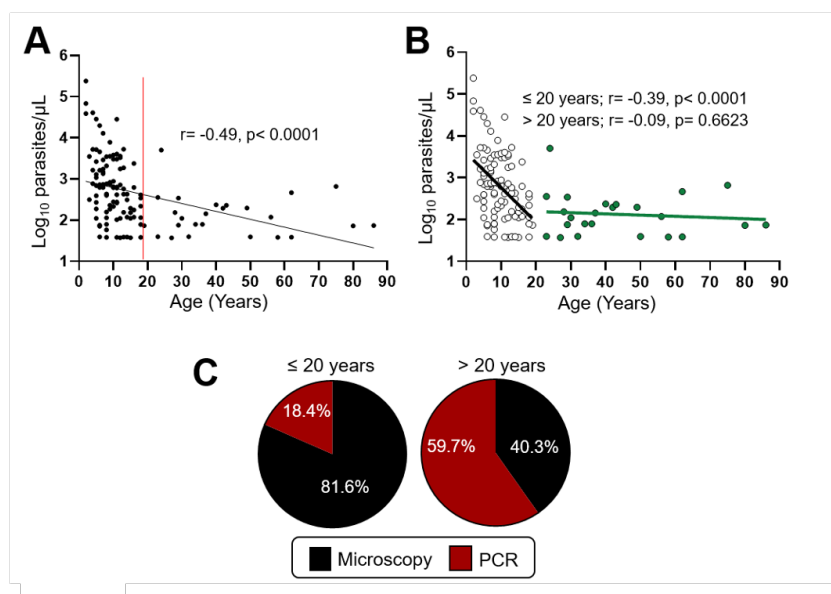

282

283 **Figure 1. Older individuals (>20 years) had a better control of parasite densities.** A) Scatterplot showing  
284 a correlation between baseline parasite densities and age in all the infected individuals with parasitemia at the  
285 detection limit of light microscopy (n= 138). Spearman rank correlation is presented as the best fit line and the  
286 coefficient (r), as well as the p-value (p), are shown. The red straight line was used to divide the study  
287 population into two groups aged  $\leq 20$  years and  $> 20$  years old for further analyses. B) Scatterplot of correlation  
288 between baseline parasitemia detected by microscopy and age in different age groups ( $\leq 20$  years and  $> 20$   
289 years) at the different time points of our study. Spearman rank correlation is presented as the best fit line and  
290 the coefficient (r), as well as the p-value (p), are shown for each age group. C) The pie chart shows the  
291 proportion of sub-microscopic infections (PCR+/microscopy-) versus microscopic (microscopy+) infections  
292 in each age group. PCR: Polymerase Chain Reaction.

293

294

295

296

297

Immunology of asymptomatic parasitemia

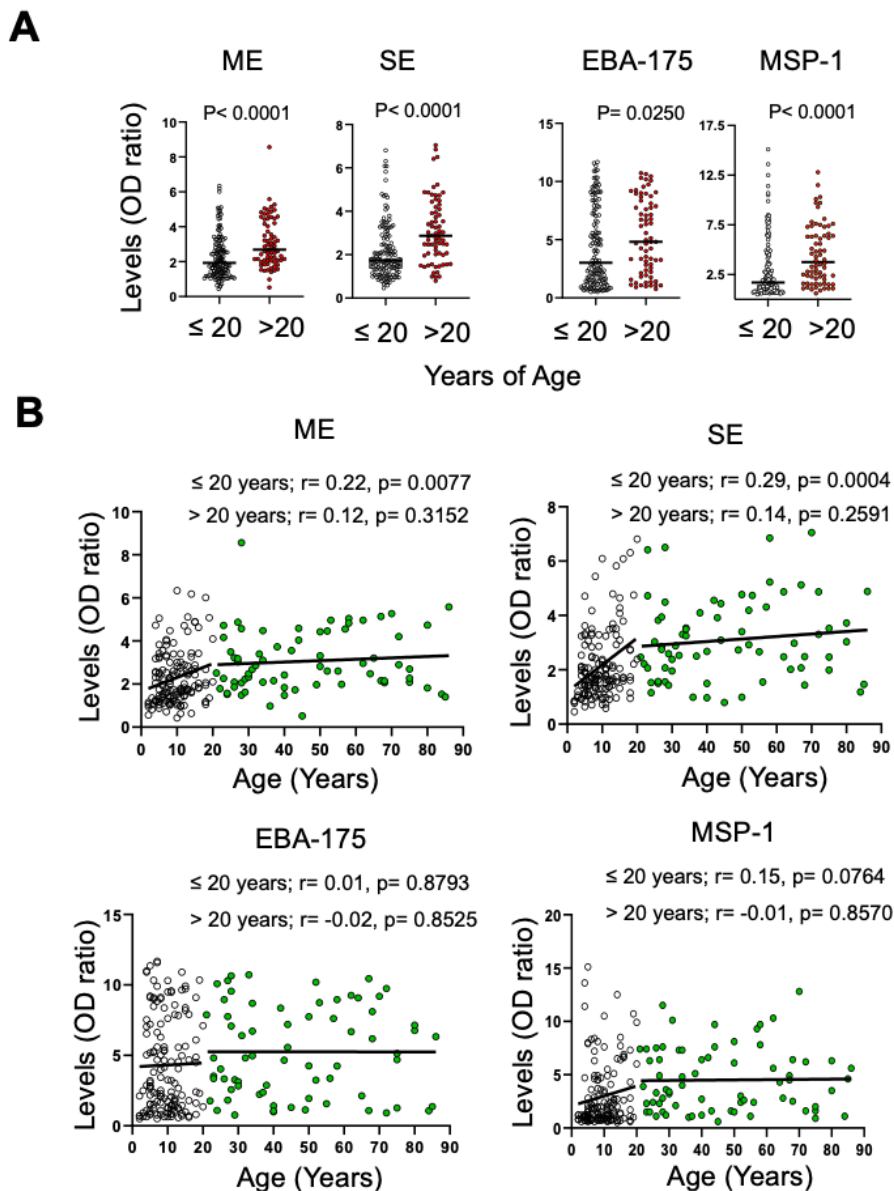

298

299 **Figure 2. Individuals >20 years old had more anti-parasite IgG at baseline.** A) Data presented in the  
 300 scatterplot represent baseline IgG antibody levels against different *P. falciparum* antigens (ME, SE, EBA-175  
 301 and MSP-1<sub>19</sub>) within age groups. Median levels between age groups were compared by Wilcoxon signed-rank  
 302 test and the p-values are shown on the graph. B) The scatterplots on B show the correlation between IgG levels  
 303 against different *P. falciparum* antigens (ME, SE, EBA-175 and MSP-1<sub>19</sub>) and age in different age groups ( $\leq$   
 304 20 years and  $> 20$  years). Spearman rank correlation is presented as the best fit line and the coefficient (r), as  
 305 well as the p-values (p), are shown for each age group. SE: Schizont extract. ME: Merozoite extract. EBA-  
 306 175: Erythrocyte binding antigen-175. MSP-1<sub>19</sub>: Merozoite surface protein-1<sub>19</sub>. OD: optical density.

307



#### Immunology of asymptomatic parasitemia

308 Similarly, no significant difference was observed in malarial IgG antibody levels and avidity between  
309 participants with symptomatic or asymptomatic parasitemia (**Supplementary Figure 4A**), and no  
310 significant difference was seen in the blood parasitemia at the detection limit of microscopy  
311 (Supplemental Figure 4B; **Table 1**). However, the *in vitro* growth inhibition potential of plasma from  
312 asymptomatic malaria was greater than that of symptomatic individuals ( $P= 0.0245$ ) despite no  
313 significant differences in the parasitemia amongst those with parasite levels that were detectable by  
314 microscopy (**Supplementary Figure 4B**). This may be a reflection of higher percentage of  
315 asymptomatic children with submicroscopic parasitemias (77.7%) compared to symptomatic children  
316 (90.5%) (**Supplementary Figure 4C**). Taken together, these data suggest that humoral responses  
317 other than IgG responses to the tested parasite antigens contribute to the maintenance of  
318 asymptomatic parasitemia in the study area.

#### 319 **Persistence of fluctuating asymptomatic parasitemia occurred in highly exposed individuals** 320 **without alteration in IgG levels**

321 Of the 142 participants who completed the follow-up study as designed, 72 (50.7%) remained  
322 asymptomatic during the 10-weeks follow-up period, whereas 69 (48.6%) developed malaria-  
323 associated fevers and 1 (0.7%) resolved the infection in the absence of any known antimalarial  
324 treatment. Surprisingly, the propensity to convert was not associated with age (**Figure 3A**). Of the 72  
325 participants who maintained chronic asymptomatic *P. falciparum* carriage, the proportion of  
326 submicroscopic infections remained similar in both age groups with most participants becoming  
327 microscopy positive on week 10 regardless of age (**Figure 3B**). Parasite densities fluctuated widely  
328 over the follow-up period from ultra-low parasitemia (sub-microscopic) to high parasitemia (**Figure**  
329 **3B**), possibly due to variation in the infecting clones from new infections as this is a high transmission  
330 area (**Figure 3C**). However, no changes in IgG levels (**Figure 3D**) against all antigens tested were  
331 observed during persistent asymptomatic infections indicating that persistent asymptomatic  
332 parasitemia does not affect anti-*Plasmodium* IgG levels over this short 3-month time period. These

## Immunology of asymptomatic parasitemia

333 data suggests that asymptomatic carriage of *P. falciparum* occurs independently of circulating  
 334 parasite numbers, even within highly-exposed individuals.

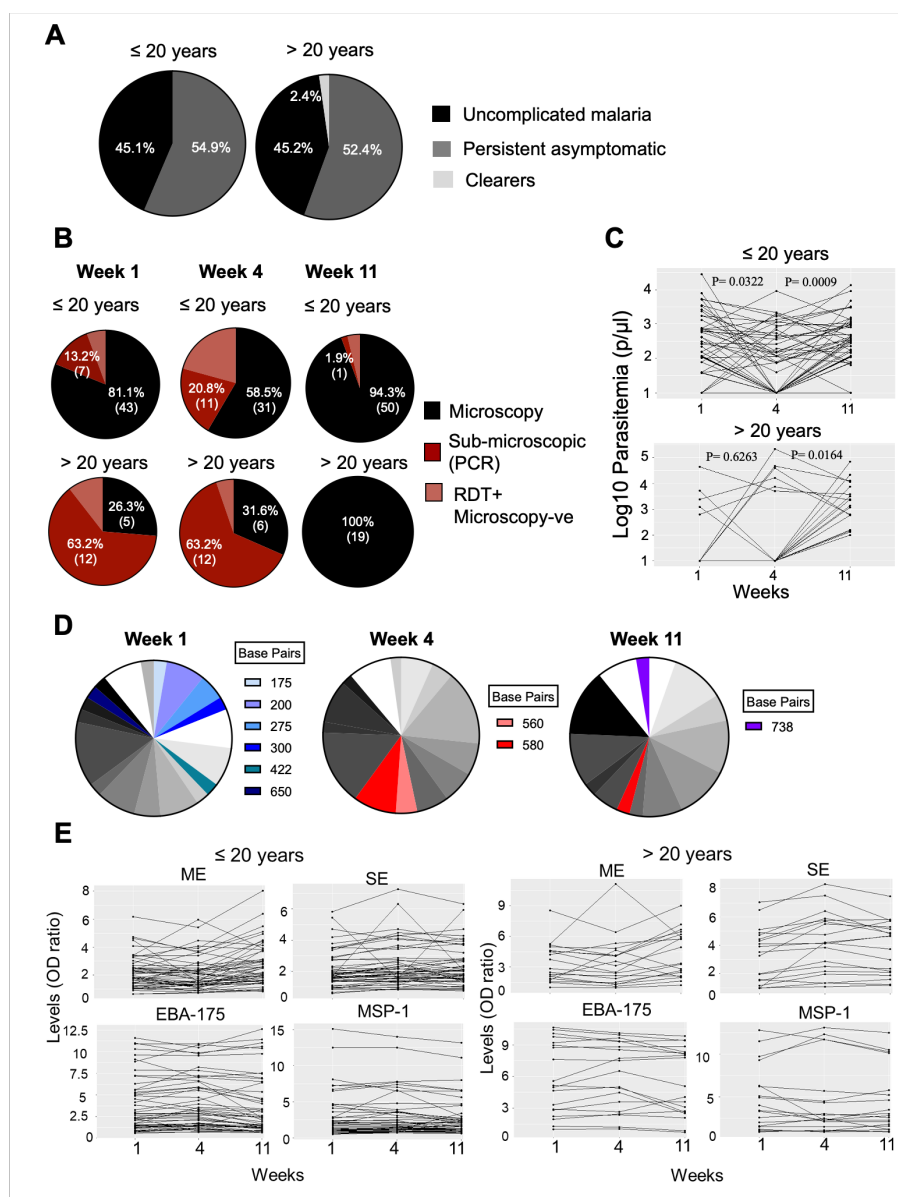

335

336 **Figure 3. Asymptomatic malaria persisted in some individuals despite changes in the circulating**  
 337 **parasite densities and population over time, but did not affect the antibody levels.** A) The pie charts  
 338 show the proportion of individuals with initial asymptomatic infection (cross-sectional) who resolved the  
 339 infection (clearers), developed malaria-associated fever (uncomplicated malaria) or remained asymptomatic  
 340 (persistent asymptomatic) over the 10-week follow-up period, according to age groups. B) Panel B displays  
 341 the proportion of sub-microscopic/microscopic parasitemia in persistent asymptotically infected  
 342 individuals at three different time points (weeks 1, 4 and 11) according to age groups. Individuals who were  
 343 RDT positive but without detectable microscopic parasitemia was detected are shown in pink. Of those who

### Immunology of asymptomatic parasitemia

344 had microscopic parasitemia, the line plots parasitemia across the 3 time points (C). To generate the line  
345 plots, the value 10 was assigned to submicroscopic parasitemia. The P values on the line plots refer to the  
346 comparison of the median parasitemia between two time points using the Wilcoxon test. D) Pie charts show  
347 the proportion of msp2 alleles (representing the clones) determined by nested PCR in individuals with  
348 persistent asymptomatic infection per week. Numbers represent the band sizes obtained. Blue slices  
349 represent the alleles only present at week 1. Red slices represent the alleles which appear at week4. Green  
350 slices represent the allele only present at week 11. Grey slices represent the alleles that were present at all  
351 three sampling time points (bands of 375, 400, 475, 500, 520, 534, 540, 600, 620, 633. 680, 700, 800 bp). E)  
352 Data presented in the line plots represent the profile of IgG anti-*Plasmodium* antibody levels in each chronic  
353 asymptotically infected individuals at three different time points (week 1, 4 and 11) in the two age groups.  
354 SE: Schizont extract. ME: Merozoite extract. EBA-175: Erythrocyte binding antigen-175. MSP-1<sub>19</sub>:  
355 Merozoite surface protein-1<sub>19</sub>. OD: optical density.

356

Immunology of asymptomatic parasitemia

357 **Parasite density was associated with inflammatory responses amongst younger individuals**  
358 **with asymptomatic malaria**

359 Given that *Plasmodium* parasites are associated with induction of inflammatory responses we  
360 measured the cytokine profiles of the 72 participants who had persistent asymptomatic carriage of  
361 *P. falciparum* across the course of our study. There was no particular cytokine signature that  
362 associated with asymptomatic carriage of *P. falciparum* in our study participants over the 11-week  
363 follow-up period (**Figure 4A**). Using a factor analysis of mixed data (FAMD) on cytokine data  
364 along with age and circulating parasite density, we found that levels of IL-10, TNF- $\alpha$ , the ratio of  
365 IL-10:IFN- $\gamma$  and MCP-1, along with age and parasite density explained most of the variation in the  
366 peripheral cytokine response in asymptomatic individuals (**Figure 4B**). Multivariable analysis using  
367 age and parasitemia as predictors showed that age independently predicted the levels of TNF- $\alpha$   
368 (coef= -0.31, P< 0.0001) peaking in younger study participants (**Figure 4C**). This is likely a  
369 reflection of circulating parasite densities which were higher in the younger group (**Figure 1**) and  
370 were also independently predictive of TNF- $\alpha$  levels (coef= 0.09, P< 0.0001) (**Figure 4D**).  
371 Circulating parasite density also independently predicted the levels of IL-10 (coef= 0.21, P<  
372 0.0001) and MCP-1 (coef= 0.06, P= 0.01) with a significant increase in those who had high levels  
373 of parasitemia (parasitemia > 413.1 parasites/ $\mu$ l) relative to those who had low levels of microscopic  
374 parasitemia (parasitemia between 37.2 parasites/ $\mu$ l and 413.1 parasites/ $\mu$ l) (**Figure 4D**). This  
375 indicates that during asymptomatic carriage of *P. falciparum* circulating parasites simultaneously  
376 induce anti-inflammatory cytokine production to counteract the inflammatory effects of TNF- $\alpha$ . To  
377 determine which cytokines were dependent on parasite carriage we treated participants at week 11  
378 of the study with ACT. This resulted in a significant decline in the IL-10 levels, but not TNF- $\alpha$  or  
379 MCP-1 levels, in the younger age group (**Figure 5**). Thus, the levels of IL-10 measured is a  
380 reflection of parasite carriage in the younger age group.

Immunology of asymptomatic parasitemia

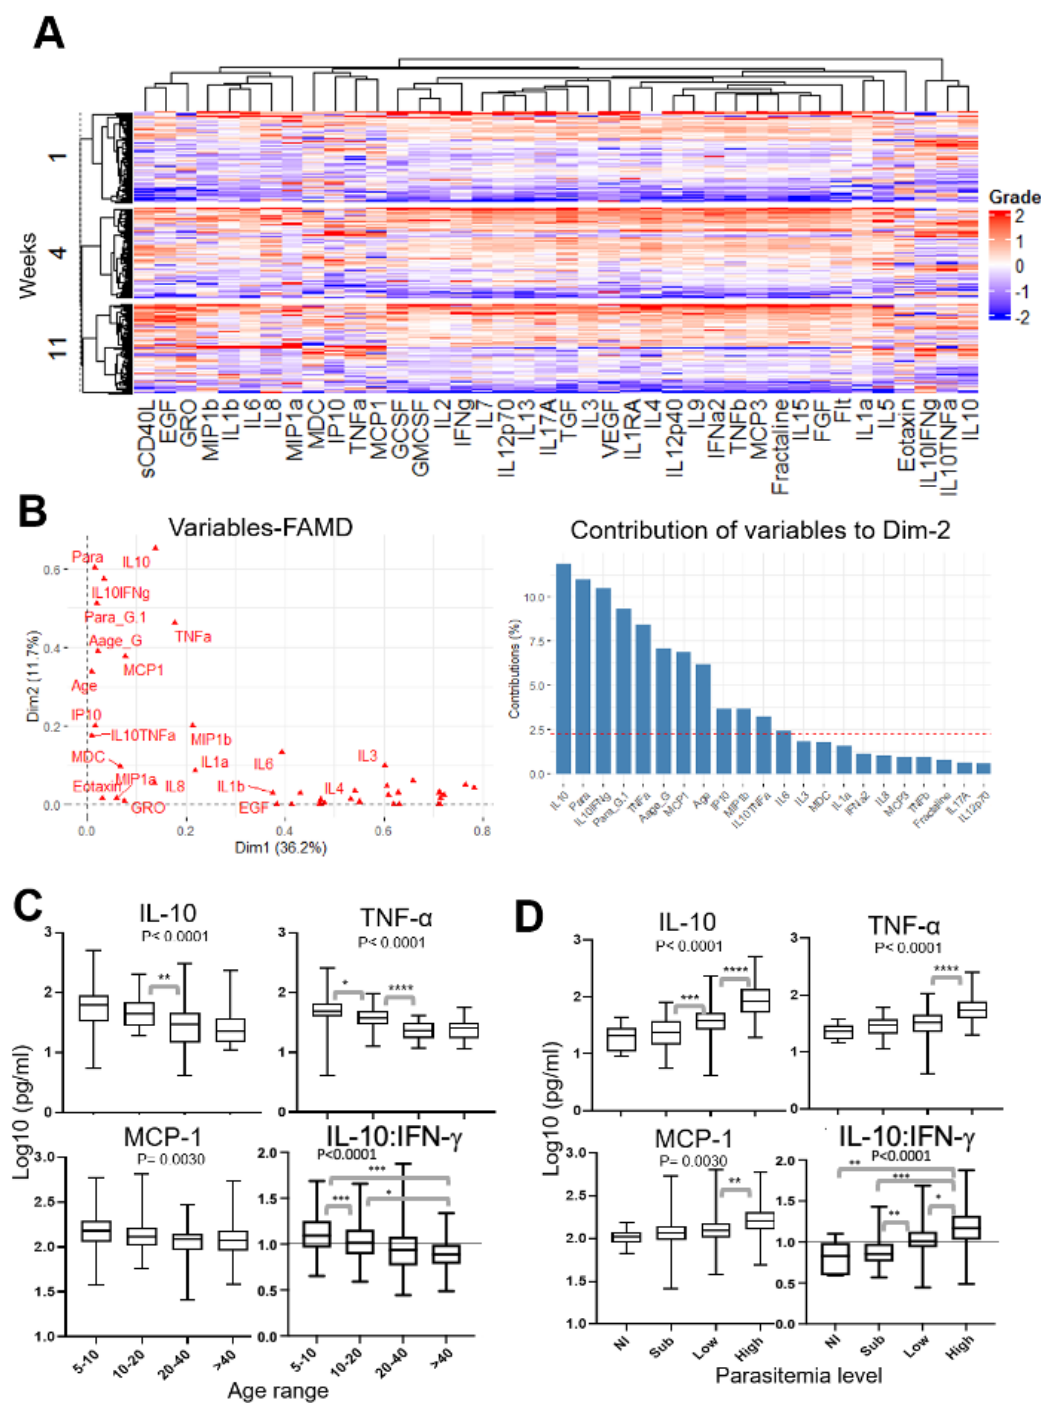

381

382 **Figure 4. Cytokine responses were blunted with increased age and correlated with parasite densities at**  
 383 **baseline. A)** Hierarchical clustering of the standardized least-square means of 38 differentially expressed  
 384 cytokines/chemokines/growth factors across the three sampling time points in participants with persistent  
 385 asymptomatic infection (n= 72). **B)** Principal component of cytokines, age and parasitemia from FAMD (left  
 386 graph) analysis. The right graph of B shows the contribution of each variable on the principal component 2  
 387 (dimension 2). **C and D)** box plots representing interquartile ranges (25th, median and 75th percentile, whisker

### Immunology of asymptomatic parasitemia

388 percentile (1st and 99th)) of the levels (Log<sub>10</sub> pg/ml) of some main regulatory cytokines measured by Luminex  
389 according to age and parasite level groups at the baseline, respectively. Median levels of cytokines between  
390 two or more groups were compared by Wilcoxon rank-sum test and Kruskal-Wallis test, respectively. In Panel  
391 A, pairwise comparisons on neighboring groups were performed only when multiple comparisons were  
392 significant at  $p < 0.05$ . Parasite densities were groups in three groups as follows: submicroscopic parasitemia,  
393 low levels of microscopic parasitemia (parasitemia  $\leq 413.1$  parasites/ $\mu$ l, representing the median parasitemia  
394 in the study population) and high levels of parasitemia (parasitemia  $> 413.1$  parasites/ $\mu$ l). FAMD: Factor  
395 analysis of mixed data. \* $p < 0.05$ ; \*\* $p < 0.001$ , \*\*\* $p < 0.0001$ , \*\*\*\* $p < 0.00001$ .

396

397

Immunology of asymptomatic parasitemia

398

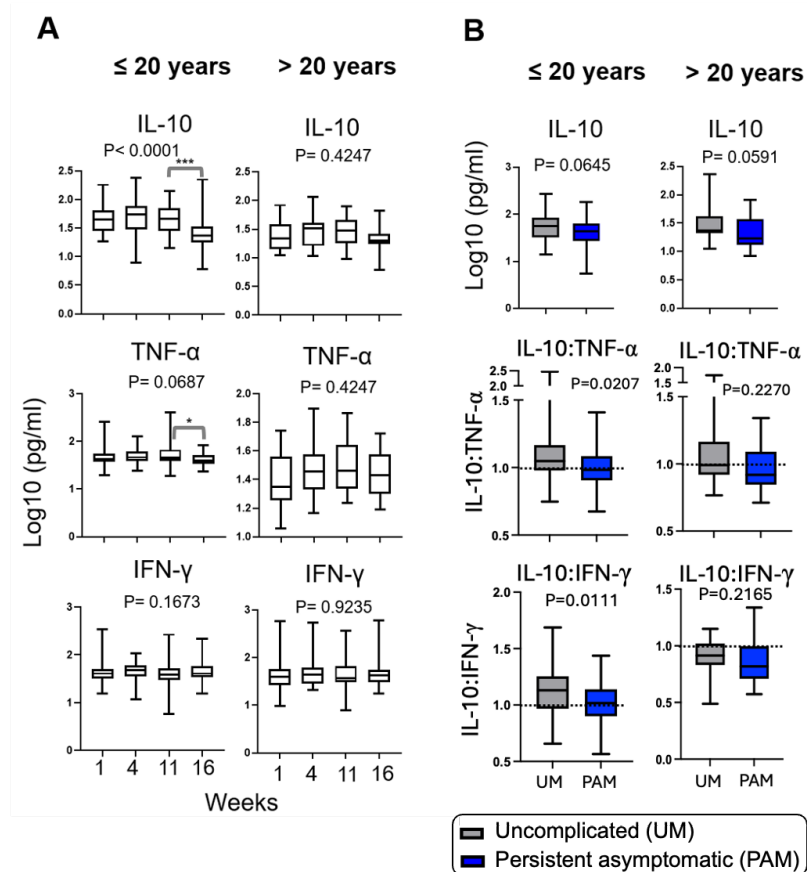

399

400 **Figure 5. IL-10 and TNF- $\alpha$  levels were a reflection of parasite carriage, and the balance of inflammatory**  
 401 **cytokines at baseline was associated with the maintenance of asymptomatic infections in the younger**  
 402 **age,  $\leq 20$  years. A) Box plots representing interquartile ranges (25th, median and 75th percentile, whisker**  
 403 **percentile (1st and 99th)) of cytokine levels (Log<sub>10</sub> pg/ml) during persistent asymptomatic infections (week 1,**  
 404 **4 and 11) and after anti-malarial treatment (week 16). B) Box plots representing interquartile ranges (25th,**  
 405 **median and 75th percentile, whisker percentile (1st and 99th)) of cytokine levels (Log<sub>10</sub> pg/ml) at the baseline**  
 406 **between in those who developed uncomplicated malaria (UM; grey) and those who went on to display**  
 407 **persistent asymptomatic malaria throughout the course of the study (PAM; blue). Analyses were performed**  
 408 **including values from individuals with submicroscopic and microscopic parasitemia. Median cytokines levels**  
 409 **between two or more groups were compared by Wilcoxon rank-sum test and Kruskal-Wallis test, respectively**  
 410 **and significant between group differences indicated by the P value on the plot. In Panel A, pairwise**  
 411 **comparisons on neighboring groups were performed only when multiple comparisons between the 4 groups**  
 412 **were significant and are shown by the grey brackets. \*p < 0.05 and \*\*\*p < 0.0001.**

Immunology of asymptomatic parasitemia

413 **Maintenance of asymptomatic carriage of *P. falciparum* is associated with a more balanced**  
414 **inflammatory cytokine ratio**

415 There was no particular cytokine signature of asymptomatic individuals relative to symptomatic  
416 individuals in our study (**Figure 6A**). However, given that anti-inflammatory cytokines may be  
417 important in down-regulating the pathogenic inflammatory response in malaria, we tested the  
418 hypothesis that asymptomatic infection would be associated with higher levels of IL-10. To our  
419 surprise, at the initial time point of our study there was a non-significant trend towards higher levels  
420 of IL-10 in the symptomatic compared to asymptomatic participants (**Figure 6B**). This may be a  
421 reflection of higher inflammation levels in symptomatic individuals as other pro-inflammatory  
422 markers (IL-6 and MCP-1) were significantly higher in individuals with symptomatic malaria  
423 compared to those with asymptomatic *P. falciparum* infections in the younger age group (**Figure 6B**).  
424 There was an IL-10-skewed ratio of IL-10:TNF- $\alpha$  and IL-10:IFN- $\gamma$  in the symptomatic group  
425 compared to the asymptomatic group in both age groups (**Figure 6C**). This is in agreement with  
426 previously published data in individuals with uncomplicated malaria and the IL-10 skewed ratio of  
427 IL-10 to TNF- $\alpha$  that can be measured in those with severe symptoms of malaria [38,39].  
428 Multivariable logistic regression analysis showed that the IL-10:TNF- $\alpha$  ratio and IL-1RA levels were  
429 independently associated with developing symptoms during *P. falciparum* infection in this study  
430 (**Supplementary Table S1**).

431

432



## Immunology of asymptomatic parasitemia

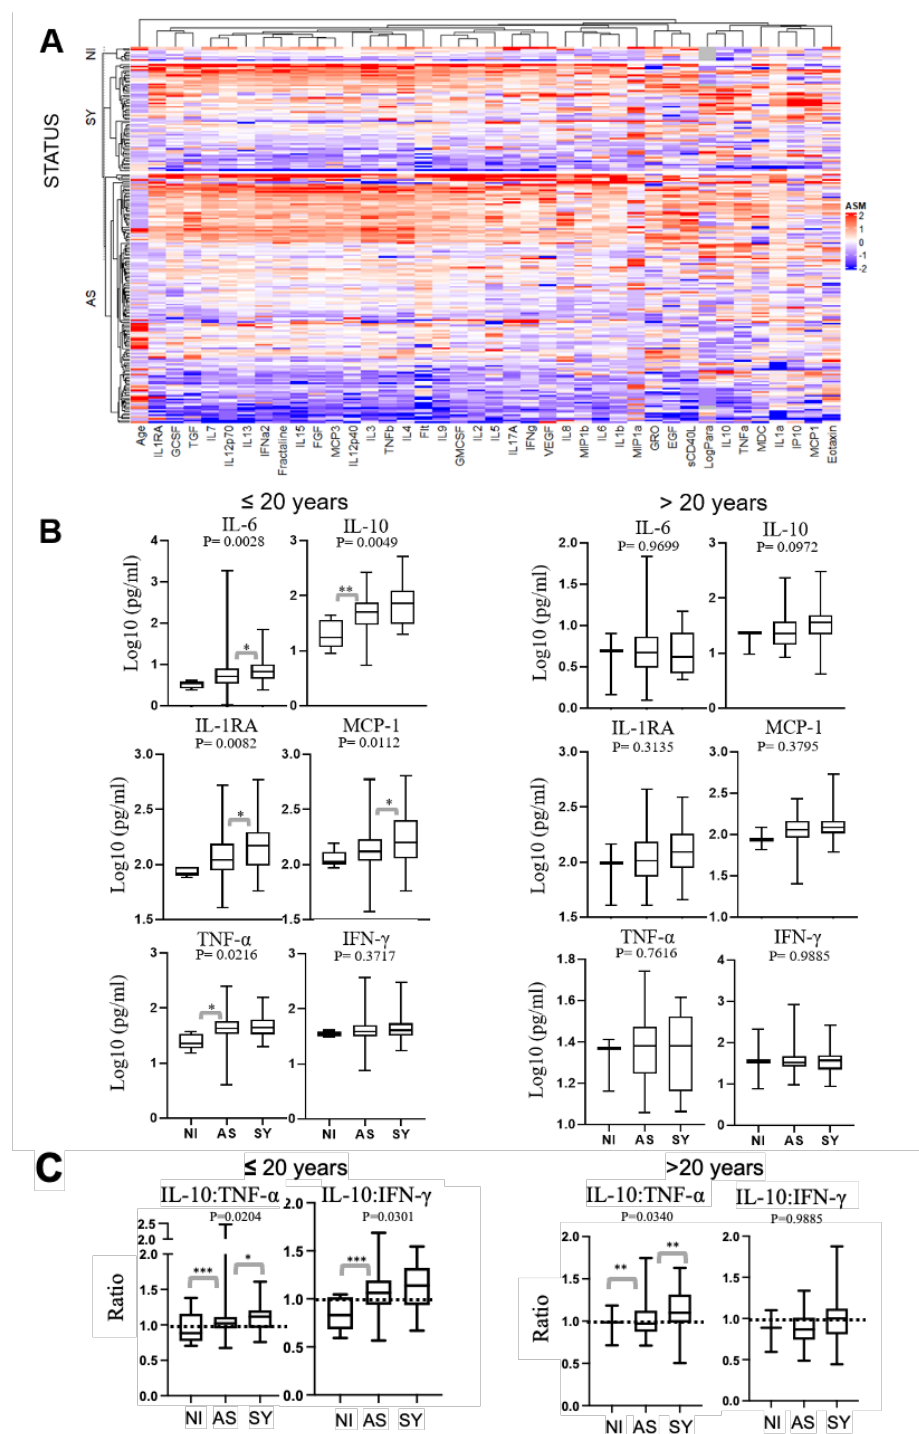

433

434 **Figure 6. IL-10 at baseline was associated with clinical malaria in the younger age group ( $\leq 20$  years).**

435 A) Hierarchical clustering (heatmap) of the standardized least-square means of 38 differentially expressed  
 436 cytokines/chemokines/growth factors by infection status at the baseline of this study. **B** and **C** box plots  
 437 represent interquartile ranges (25th, median and 75th percentile, whisker percentile (1st and 99th)) of the  
 438 baseline cytokine levels ( $\text{Log}_{10}$  pg/ml) measured by Luminex according to infection status. Analyses were  
 439 performed including both individuals submicroscopic and microscopic parasitemia. Median levels of cytokines  
 440 between two or three groups were compared by Wilcoxon rank-sum test and Kruskal-Wallis test, respectively.

## Immunology of asymptomatic parasitemia

441 In Panel B and C, pairwise comparisons were performed only when multiple comparisons were significant. P  
442 values refer to the Kruskal-Wallis test comparison between the three groups. NI: Non-infected. AS:  
443 Asymptomatic. SY: Symptomatic. \* $p < 0.05$ ; \*\* $p < 0.001$ ; \*\*\* $p < 0.0001$ .

444

445 To further test the hypothesis that asymptomatic carriage of *P. falciparum* may be related to IL-10  
446 production, we compared the cytokine ratios in the younger group who converted to symptomatic  
447 malaria throughout our study with those who remained asymptomatic. At the initial time point of the  
448 study there was a trend towards increased IL-10 levels in those who subsequently went on to develop  
449 uncomplicated malaria compared to those who experienced persistent asymptomatic malaria in both  
450 age groups. In the younger age group IL-10/pro-inflammatory cytokine ratios were significantly  
451 higher and IL-10-skewed ( $P = 0.0207$  and  $P = 0.0111$  for IL-10:TNF- $\alpha$  and IL-10:IFN- $\gamma$  ratios,  
452 respectively) in the those developing uncomplicated malaria compared to those with persistent  
453 asymptomatic malaria in younger age group (**Figure 5B**). In this group those with persistent  
454 asymptomatic malaria had a ratios of  $1.001 \pm 0.1355$  for IL-10:TNF- $\alpha$  and  $1.016 \pm 0.1794$  for IL-  
455 10:IFN- $\gamma$ ) displaying an even balance of IL-10: proinflammatory cytokine. On the other hand adults  
456 did not have IL-10 skewed ratios with TNF- $\alpha$  or IFN- $\gamma$  suggesting that a different or additional  
457 mechanism may facilitate the persistence of asymptomatic malaria in the older age group.  
458 Collectively this data suggests that IL-10 is not sufficient to dampen inflammatory responses in  
459 *Plasmodium* infection that lead to the fevers that define uncomplicated malaria.

460

## 461 Discussion

462 Significant gaps exist in the understanding of the contribution of anti-parasite and anti-disease  
463 immunity in the persistent asymptomatic parasite carriage in areas with high transmission of *P.*  
464 *falciparum*. Mathematical modelling of existing data indicates that asymptomatic *P.*  
465 *falciparum* infections could last for as long as 13-years [40] and field data documents the longevity  
466 of asymptomatic infections ranges from at least 2-9 months [7,41,42]. As we have previously

## Immunology of asymptomatic parasitemia

467 published, our study area has high rate of persistent asymptomatic parasite carriage over the 3 month  
468 time period of study [24]. However, a proportion of individuals in our study converted to symptomatic  
469 malaria as defined by the development of fever. Thus, we have assessed immune correlates of  
470 asymptomatic carriage of *P. falciparum*, as well as the predictors of conversion to symptomatic  
471 malaria.

472 Consistent with the acquisition of immune response with age and exposure [13,43] in our study, older  
473 asymptomatic individuals had better control of circulating iRBCs with a greater proportion of sub-  
474 microscopic infections than younger individuals. This was associated with an increase in the quantity  
475 of circulating anti-parasite IgG which appeared to saturate at around 20 years old. Our data is in  
476 agreement with an age-structured mathematical model of malaria transmission which showed that  
477 anti-parasite immunity which results in more rapid clearance of parasitemia has an approximate half-  
478 life of 20 years [44]. With a focus on the younger age group, there did not appear to be any correlations  
479 with respect to parasitemia levels and IgG levels or the avidity of the IgG. The *in vitro* invasion-  
480 blocking capability of the plasma in young individuals had some functionality with respect to invasion  
481 blocking, but only at higher parasitemia levels. In this assay plasma factors other than IgG, such as  
482 IgM [45,46], may contribute to this observation and control of *P. falciparum* parasitemia in children.  
483 Collectively these data support a role for IgG in exerting control of iRBCs in *P. falciparum* infections,  
484 but it may not be the principal factor that dictates asymptomatic carriage of parasites in younger  
485 individuals.

486 Surprisingly the proportion of those developing uncomplicated malaria over the course of our study  
487 was comparable between the younger and the older age groups, suggesting that the conversion from  
488 an asymptomatic to symptomatic infection is independent of age in highly exposed individuals. The  
489 reasons for this finding are not clear but may be related to heterogeneity of the circulating *P.*  
490 *falciparum* parasite population and emergence of highly inflammatory parasite clonotypes [47,48]  
491 that overcome the pyrogenic threshold of individuals. Consistent with the oscillation of parasite  
492 densities over time reported in a Vietnam cohort [7], parasitemia in persistent asymptomatic

## Immunology of asymptomatic parasitemia

493 infections in our study fluctuated widely and independently of IgG levels, and different clonotypes  
494 of *P. falciparum* were observed at different time points in this study.

495 Cytokine profiles are considerably more dynamic than IgG responses. In line with the hypothesis that  
496 clinical immunity to malaria is mediated by a tempering of inflammation, previous studies have  
497 shown that the clinical outcome of malaria infection is largely dictated by the balance between pro-  
498 inflammatory and anti-inflammatory markers [17,18]. Although our study highlighted that carriage  
499 of *P. falciparum* across the duration of this study was associated with a consistent inflammatory  
500 response characterized by TNF- $\alpha$ , IL-10 and MCP-1, we found no obvious cytokine signature  
501 associated with the asymptomatic carriage of *P. falciparum* when compared to symptomatic  
502 individuals. Similar to findings in a study of visceral leishmaniasis [49], where increased IL-10 levels  
503 were the primary predictor of clinical conversion from asymptomatic to symptomatic  
504 visceral leishmaniasis, the conversion from asymptomatic to symptomatic malaria in our study was  
505 linked to increased baseline levels of IL-10 skewed ratios with TNF- $\alpha$  and IFN- $\gamma$  in children at the  
506 initial time point of our study.

507 Although IL-10 is known to exert anti-inflammatory effects that include inhibition of monocytes and  
508 macrophages in the production of inflammatory cytokines such as IL-6, TNF- $\alpha$ , and IL-1 [50], in  
509 agreement with a recent study from the Gambia [51] in our study IL-10 was associated with the  
510 presence of *Plasmodium* parasites. Given that higher levels of IL-6, IL-1RA and MCP-1 were also  
511 associated with symptomatic infections in the younger age group of our study, IL-10 levels are likely  
512 a consequence of increased inflammation. Notably, IL-10 induces IL1RA, a potent anti-inflammatory  
513 cytokine that regulates the pro-inflammatory actions of IL-1 [52] that has previously been shown to  
514 be associated with severity of malarial disease [53]. At the baseline time point in our study, we found  
515 that balanced inflammatory cytokine ratios were correlated with developing symptoms from *P.*  
516 *falciparum* infection in our younger age group. Specifically, those who developed uncomplicated  
517 malaria had a significant IL-10 skewed ratio at the initial time point compared to those who had

Immunology of asymptomatic parasitemia

518 persistent asymptomatic malaria. An IL-10 skewed ratio may indicate that an individual will shortly  
519 develop symptoms of *P. falciparum* infection.

520 Most of the association between biomarkers and clinical malaria in this study were only found in the  
521 younger age group, but not in adults, indicating that the mechanisms of the protection against clinical  
522 malaria may be different according to age. As such, more studies into how asymptomatic carriage of  
523 *Plasmodium* occurs are warranted and should include non-antibody mediated mechanisms of parasite  
524 control and clinical immunity which may be relevant in children.

525

## 526 **Acknowledgements**

527 We thank the field staff and, most importantly, residents of the Esse Health district in Cameroon who  
528 participated in this study.

529

## 530 **Author contributions**

531 BF devised the experiments, performed the experiments, analyzed data, and wrote the paper; FM,  
532 MFA, EE, CD, GC, MK, RK and SK performed fieldwork and sample processing; MS and RP  
533 provided cytokine kits and recombinant *P. falciparum* antigens, respectively and reviewed paper. RM  
534 supervised the experiments and reviewed paper; LA and TL devised the experiments, supervised the  
535 experiments, analyzed data, and wrote the paper.

## 536 **Financial Support:**

537 This work was supported by the Institute Pasteur International Division to LSA.

## 538 **Competing interests**

539 Authors declare no competing interests.

540

## Immunology of asymptomatic parasitemia

### 541 **References**

- 542 1. WHO. World Malaria Report. Geneva; 2023.
- 543 2. Cibulskis RE, Alonso P, Aponte J, et al. Malaria: Global progress 2000 - 2015 and future  
544 challenges. *Infect Dis Poverty*. **2016**; 5(1):61.
- 545 3. Galatas B, Bassat Q, Mayor A. Malaria Parasites in the Asymptomatic: Looking for the Hay in  
546 the Haystack. *Trends Parasitol*. **2016**; 32(4):296–308.
- 547 4. Drakeley C, Gonçalves B, Okell L, Slater H. Understanding the Importance of Asymptomatic  
548 and Low- Density Infections for Malaria Elimination. In: Manguin S, Dev V, editors. *Malar*  
549 *Elimin - Leap Forw* [Internet]. InTech; 2018 [cited 2018 Sep 4]. Available from:  
550 [http://www.intechopen.com/books/towards-malaria-elimination-a-leap-](http://www.intechopen.com/books/towards-malaria-elimination-a-leap-forward/understanding-the-importance-of-asymptomatic-and-low-density-infections-for-malaria-elimination)  
551 [forward/understanding-the-importance-of-asymptomatic-and-low-density-infections-for-](http://www.intechopen.com/books/towards-malaria-elimination-a-leap-forward/understanding-the-importance-of-asymptomatic-and-low-density-infections-for-malaria-elimination)  
552 [malaria-elimination](http://www.intechopen.com/books/towards-malaria-elimination-a-leap-forward/understanding-the-importance-of-asymptomatic-and-low-density-infections-for-malaria-elimination)
- 553 5. Ashley EA, White NJ. The duration of *Plasmodium falciparum* infections. *Malar J*. **2014**;  
554 13(1):500.
- 555 6. Slater HC, Ross A, Felger I, et al. The temporal dynamics and infectiousness of subpatent  
556 *Plasmodium falciparum* infections in relation to parasite density. *Nat Commun* [Internet]. **2019**  
557 [cited 2020 Jun 4]; 10. Available from:  
558 <https://www.ncbi.nlm.nih.gov/pmc/articles/PMC6440965/>
- 559 7. Nguyen T-N, Seidlein L von, Nguyen T-V, et al. The persistence and oscillations of  
560 submicroscopic *Plasmodium falciparum* and *Plasmodium vivax* infections over time in  
561 Vietnam: an open cohort study. *Lancet Infect Dis*. **2018**; 18(5):565–572.
- 562 8. Ademolue TW, Awandare GA. Evaluating antidisease immunity to malaria and implications for  
563 vaccine design. *Immunology*. **2018**; 153(4):423–434.
- 564 9. Ademolue TW, Awandare GA. Evaluating antidisease immunity to malaria and implications for  
565 vaccine design. *Immunology*. **2018**; 153(4):423–434.
- 566 10. Kijogi C, Kimura D, Bao LQ, et al. Modulation of immune responses by *Plasmodium falciparum*  
567 infection in asymptomatic children living in the endemic region of Mbita, western Kenya.  
568 *Parasitol Int*. **2018**; 67(3):284–293.
- 569 11. Ouédraogo M, Samadoulougou S, Rouamba T, et al. Spatial distribution and determinants of  
570 asymptomatic malaria risk among children under 5 years in 24 districts in Burkina Faso. *Malar*  
571 *J*. **2018**; 17:460.
- 572 12. Griffin JT, Hollingsworth TD, Reyburn H, Drakeley CJ, Riley EM, Ghani AC. Gradual  
573 acquisition of immunity to severe malaria with increasing exposure. *Proc R Soc B Biol Sci*.  
574 **2015**; 282(1801):20142657–20142657.
- 575 13. White M, Watson J. Age, exposure and immunity. *eLife* [Internet]. **2021** [cited 2021 Mar 31];  
576 7. Available from: <https://www.ncbi.nlm.nih.gov/pmc/articles/PMC6103766/>
- 577 14. Boyle MJ, Reiling L, Feng G, et al. Human Antibodies Fix Complement to Inhibit *Plasmodium*  
578 *falciparum* Invasion of Erythrocytes and Are Associated with Protection against Malaria.  
579 *Immunity*. **2015**; 42(3):580–590.



## Immunology of asymptomatic parasitemia

- 580 15. Duncan CJA, Hill AVS, Ellis RD. Can growth inhibition assays (GIA) predict blood-stage  
581 malaria vaccine efficacy? *Hum Vaccines Immunother.* **2012**; 8(6):706–714.
- 582 16. Garcia-Senosaiain A, Kana IH, Singh S, et al. Neutrophils dominate in opsonic phagocytosis of  
583 *P. falciparum* blood-stage merozoites and protect against febrile malaria. *Commun Biol.* **2021**;  
584 4(1):984.
- 585 17. Rovira-Vallbona E, Moncunill G, Bassat Q, et al. Low antibodies against *Plasmodium*  
586 *falciparum* and imbalanced pro-inflammatory cytokines are associated with severe malaria in  
587 Mozambican children: a case–control study. *Malar J.* **2012**; 11:181.
- 588 18. Andrade BB, Santos CJN, Camargo LM, et al. Hepatitis B Infection Is Associated with  
589 Asymptomatic Malaria in the Brazilian Amazon. *PLOS ONE.* **2011**; 6(5):e19841.
- 590 19. Kimenyi KM, Wamae K, Ochola-Oyier LI. Understanding *P. falciparum* Asymptomatic  
591 Infections: A Proposition for a Transcriptomic Approach. *Front Immunol* [Internet]. **2019** [cited  
592 2019 Dec 12]; 10. Available from: <https://www.ncbi.nlm.nih.gov/pmc/articles/PMC6803459/>
- 593 20. Guiyedi V, Bécavin C, Herbert F, et al. Asymptomatic *Plasmodium falciparum* infection in  
594 children is associated with increased auto-antibody production, high IL-10 plasma levels and  
595 antibodies to merozoite surface protein 3. *Malar J* [Internet]. **2015** [cited 2018 Feb 5]; 14(1).  
596 Available from: <http://www.malariajournal.com/content/14/1/162>
- 597 21. Gonçalves RM, Scopel KK, Bastos MS, Ferreira MU. Cytokine balance in human malaria: does  
598 *Plasmodium vivax* elicit more inflammatory responses than *Plasmodium falciparum*? *PLoS*  
599 *One.* **2012**; 7(9):e44394.
- 600 22. Wilson NO, Bythwood T, Solomon W, et al. Elevated levels of IL-10 and G-CSF associated  
601 with asymptomatic malaria in pregnant women. *Infect Dis Obstet Gynecol.* **2010**; 2010.
- 602 23. Essangui E, Moukoko CEE, Nguedia N, et al. Demographical, hematological and serological  
603 risk factors for *Plasmodium falciparum* gametocyte carriage in a high stable transmission zone  
604 in Cameroon. *PLOS ONE.* **2019**; 14(4):e0216133.
- 605 24. Fogang B, Biabi MF, Megnekou R, et al. High Prevalence of Asymptomatic Malarial Anemia  
606 and Association with Early Conversion from Asymptomatic to Symptomatic Infection in a  
607 *Plasmodium falciparum* Hyperendemic Setting in Cameroon. *Am J Trop Med Hyg.* **2021**;  
608 :tpmd210316.
- 609 25. Biabi MFAB, Fogang B, Essangui E, et al. High Prevalence of Polyclonal *Plasmodium*  
610 *falciparum* Infections and Association with Poor IgG Antibody Responses in a Hyper-Endemic  
611 Area in Cameroon. *Trop Med Infect Dis.* **2023**; 8(8):390.
- 612 26. Plowe CV, Djimde A, Bouare M, Doumbo O, Wellems TE. Pyrimethamine and proguanil  
613 resistance-conferring mutations in *Plasmodium falciparum* dihydrofolate reductase: polymerase  
614 chain reaction methods for surveillance in Africa. *Am J Trop Med Hyg.* **1995**; 52(6):565–568.
- 615 27. Ranford-Cartwright LC, Taylor J, Umasunthar T, et al. Molecular analysis of recrudescence  
616 parasites in a *Plasmodium falciparum* drug efficacy trial in Gabon. *Trans R Soc Trop Med Hyg.*  
617 **1997**; 91(6):719–724.
- 618 28. Quintana M del P, Ch'ng J-H, Zandian A, et al. SURGE complex of *Plasmodium falciparum* in  
619 the rhoptry-neck (SURFIN4.2-RON4-GLURP) contributes to merozoite invasion. *PLOS ONE.*  
620 **2018**; 13(8):e0201669.

## Immunology of asymptomatic parasitemia

- 621 29. Heiber A, Spielmann T. Preparation of parasite protein extracts and western blot analysis. *Bio-*  
622 *Protoc.* **2014**; 4:e1136.
- 623 30. Bonnet S, Pêtres S, Holm I, et al. Soluble and glyco-lipid modified baculovirus *Plasmodium*  
624 *falciparum* C-terminal merozoite surface protein 1, two forms of a leading malaria vaccine  
625 candidate. *Vaccine.* **2006**; 24(33–34):5997–6008.
- 626 31. Perraut R, Varela M-L, Loucoubar C, et al. Serological signatures of declining exposure  
627 following intensification of integrated malaria control in two rural Senegalese communities.  
628 *PLoS ONE* [Internet]. **2017** [cited 2019 Sep 8]; 12(6). Available from:  
629 <https://www.ncbi.nlm.nih.gov/pmc/articles/PMC5469466/>
- 630 32. Berry AA, Gottlieb ER, Kouriba B, et al. Immunoglobulin G subclass and antibody avidity  
631 responses in Malian children immunized with *Plasmodium falciparum* apical membrane antigen  
632 1 vaccine candidate FMP2.1/AS02 A. *Malar J.* **2019**; 18(1):13.
- 633 33. Duncan EH, Bergmann-Leitner ES. Miniaturized Growth Inhibition Assay to Assess the Anti-  
634 blood Stage Activity of Antibodies. In: Vaughan A, editor. *Malar Vaccines* [Internet]. New  
635 York, NY: Springer New York; 2015 [cited 2019 Apr 30]. p. 153–165. Available from:  
636 [http://link.springer.com/10.1007/978-1-4939-2815-6\\_13](http://link.springer.com/10.1007/978-1-4939-2815-6_13)
- 637 34. Efangé NM, Lobe MMM, Keumoe R, Ayong L, Efangé SMN. Spirofused  
638 tetrahydroisoquinoline-oxindole hybrids as a novel class of fast acting antimalarial agents with  
639 multiple modes of action. *Sci Rep.* **2020**; 10:17932.
- 640 35. R Core Team. R: A Language and Environment for Statistical Computing [Internet]. R  
641 Foundation for Statistical Computing; 2021. Available from: <https://www.R-project.org/>
- 642 36. Bates D, Mächler M, Bolker B, Walker S. Fitting Linear Mixed-Effects Models Using lme4. *J*  
643 *Stat Softw.* 2015;67(1):1-48.
- 644 37. Kuznetsova A, Brockhoff P, Christensen R. lmerTest: Tests in linear mixed effects models.  
645 <https://cranr-project.org/package=lmerTest>. 2016.
- 646 38. May J, Lell B, Luty AJ, Meyer CG, Kremsner PG. Plasma interleukin-10:Tumor necrosis factor  
647 (TNF)-alpha ratio is associated with TNF promoter variants and predicts malarial complications.  
648 *J Infect Dis.* **2000**; 182(5):1570–1573.
- 649 39. Othoro C, Lal AA, Nahlen B, Koech D, Orago AS, Udhayakumar V. A low interleukin-10  
650 tumor necrosis factor-alpha ratio is associated with malaria anemia in children residing in a  
651 holoendemic malaria region in western Kenya. *J Infect Dis.* 1999;179(1):279-82. doi:  
652 10.1086/314548. PubMed PMID: 9841855.
- 653 40. Ashley EA, White NJ. The duration of *Plasmodium falciparum* infections. *Malar J.* **2014**;  
654 13(1):500.
- 655 41. Felger I, Maire M, Bretscher MT, et al. The Dynamics of Natural *Plasmodium falciparum*  
656 Infections. Gosling RD, editor. *PLoS ONE.* **2012**; 7(9):e45542.
- 657 42. Landier J, Kajechiwa L, Thwin MM, et al. Safety and effectiveness of mass drug administration  
658 to accelerate elimination of artemisinin-resistant *falciparum* malaria: A pilot trial in four villages  
659 of Eastern Myanmar. *Wellcome Open Res.* **2017**; 2:81.



## Immunology of asymptomatic parasitemia

- 662 43. Rodriguez-Barraquer I, Arinaitwe E, Jagannathan P, et al. Quantification of anti-parasite and  
663 anti-disease immunity to malaria as a function of age and exposure. *eLife*. **2018**; 7:e35832.
- 664 44. Filipe JAN, Riley EM, Drakeley CJ, Sutherland CJ, Ghani AC. Determination of the Processes  
665 Driving the Acquisition of Immunity to Malaria Using a Mathematical Transmission Model.  
666 *PLOS Comput Biol. Public Library of Science*; **2007**; 3(12):e255.
- 667 45. Hopp CS, Sekar P, Diouf A, et al. Plasmodium falciparum-specific IgM B cells dominate in  
668 children, expand with malaria, and produce functional IgM. *J Exp Med*. **2021**;  
669 218(4):e20200901.
- 670 46. Thouvenel CD, Fontana MF, Netland J, et al. Multimeric antibodies from antigen-specific  
671 human IgM+ memory B cells restrict Plasmodium parasites. *J Exp Med*. **2021**;  
672 218(4):e20200942.
- 673 47. Corrigan RA, Rowe JA. Strain variation in early innate cytokine induction by Plasmodium  
674 falciparum. *Parasite Immunol*. **2010**; 32(7):512–527.
- 675 48. Allan RJ, Rowe A, Kwiatkowski D. Plasmodium falciparum varies in its ability to induce tumor  
676 necrosis factor. *Infect Immun*. **1993**; 61(11):4772–4776.
- 677 49. Topno RK, Kumar R, Pandey K, et al. Early diagnostic marker for the conversion of  
678 asymptomatic to symptomatic visceral leishmaniasis. *J Med Allied Sci*. **2019**; 9(2):96–99.
- 679 50. Waal Malefyt R de, Abrams J, Bennett B, Figdor CG, Vries JE de. Interleukin 10(IL-10) inhibits  
680 cytokine synthesis by human monocytes: an autoregulatory role of IL-10 produced by  
681 monocytes. *J Exp Med*. **1991**; 174(5):1209–1220.
- 682 51. Mooney JP, DonVito SM, Jahateh M, et al. “Bouncing Back” From Subclinical Malaria:  
683 Inflammation and Erythrocytosis After Resolution of P. falciparum Infection in Gambian  
684 Children. *Front Immunol*. **2022**; 13:780525.
- 685 52. Arend WP, Malyak M, Guthridge CJ, Gabay C. Interleukin-1 receptor antagonist: role in  
686 biology. *Annu Rev Immunol*. **1998**; 16:27–55.
- 687 53. John CC, Park GS, Sam-Agudu N, Opoka RO, Boivin MJ. Elevated serum levels of IL-1ra in  
688 children with P. falciparum malaria are associated with increased severity of disease. *Cytokine*.  
689 **2008**; 41(3):204–208.

690

691
